# Supplementary material for: Effects of Withania somnifera Extract in Chronically Stressed Adults: A Randomized Controlled Trial
Source: MDPI journal article supplement (doi:10.3390/nu16091293), 2024-04-26
Supplement: s1 [file s1]

## Supplementary Materials

**Supplement Table S1.** Linear Mixed Models (difference-in-difference evaluation) of all parameters evaluated in the subjects consuming the placebo or the WS extracts (125, 250 and 500 mg) during the 8-weeks of intervention. (per-protocol analysis, n=98)

| Outcome                    | Model 1                |                          |                        | Model 2                 |                         |
|----------------------------|------------------------|--------------------------|------------------------|-------------------------|-------------------------|
|                            | WS125 mg vs<br>Placebo | WS250 mg vs<br>Placebo   | WS500 mg vs<br>Placebo | WS125 mg vs<br>WS250 mg | WS500 mg vs<br>WS250 mg |
| Plasma DHEA-S<br>(µg/dl)   | -0.53 (1.7)            | -1.02 (1.7)              | -2.82 (1.77)           | 0.49 (1.79)             | -1.8 (1.87)             |
| DHEAS to Cortisol<br>ratio | 0.51 (0.3)             | 0.82 (0.3)**             | 0.71 (0.31)*           | -0.31 (0.33)            | -0.11 (0.34)            |
| Plasma hs-CRP (mg/l)       | -0.07 (0.04)           | -0.08 (0.04)*            | -0.09 (0.04)*          | 0.01 (0.01)             | -0.01 (0.01)            |
| Plasma IL-1β (pg/ml)       | -74.37 (21.64)***      | -133.12<br>(21.64)***    | -153.13 (22.56)***     | 58.75 (22.05)**         | -20.01 (23.03)          |
| Plasma IL-6 (pg/ml)        | -593.79 (314.07)       | -673.12 (314.07)*        | -1064.44 (327.49)**    | 79.33 (278.55)          | -391.32 (290.94)        |
| Plasma TNF-α<br>(pg/ml)    | -2460.54 (1341.78)     | -5048.04<br>(1341.78)*** | -4228.46 (1399.11)**   | 2587.5 (1379.49)        | 819.58 (1440.83)        |
| PSQI                       | -0.32 (0.17)           | -0.51 (0.17)**           | -0.7 (0.17)***         | 0.19 (0.17)             | -0.19 (0.17)            |
| VAS-S                      | 0.32 (0.04)***         | 0.39 (0.04)***           | 0.41 (0.05)***         | -0.08 (0.05)            | 0.01 (0.05)             |
| VAS-E                      | 0.17 (0.05)***         | 0.35 (0.05)***           | 0.33 (0.05)***         | -0.18 (0.05)***         | -0.02 (0.05)            |
| WHOQOL1                    | -0.01 (0.09)           | 0.23 (0.09)*             | 0.21 (0.09)*           | -0.24 (0.08)**          | -0.02 (0.09)            |
| WHOQOL2                    | -0.14 (0.07)*          | 0.09 (0.07)              | 0.01 (0.07)            | -0.23 (0.07)**          | -0.07 (0.07)            |
| WHOQOL3                    | -0.05 (0.04)           | -0.01 (0.04)             | -0.03 (0.04)           | -0.04 (0.04)            | -0.02 (0.04)            |
| WHOQOL4                    | -0.03 (0.11)           | 0.06 (0.11)              | -0.03 (0.11)           | -0.09 (0.1)             | -0.09 (0.11)            |

Values are the slope coefficient (SE). Model 1 compares all treatment groups versus the placebo group (reference) and. Model 2 compares three treatment groups, 125mg, 250mg (reference). All models were adjusted for sex, age, BMI, and the corresponding baseline measure. \* $p < 0.05$ , \*\*  $p < 0.01$ , \*\*\*  $p < 0.001$ .

**Supplemental Table S2.** Quality of life outcomes at each study timepoint among treatment and placebo groups (per-protocol analysis, n=98)

|                                            | Placebo                  | WS125 mg                 | WS250mg                 | WS500mg                 | P-value |
|--------------------------------------------|--------------------------|--------------------------|-------------------------|-------------------------|---------|
| Domain 1 (Physical health). mean ± SD      |                          |                          |                         |                         |         |
| Baseline                                   | 16.08±2.28               | 16.88±2.92               | 16.50±2.98              | 16.32±3.21              | 0.7905  |
| 2 weeks                                    | 17.04±2.07               | 17.96±2.46               | 18.27±2.59              | 17.41±2.89              | 0.3185  |
| 4 weeks                                    | 18.71±2.84               | 18.58±2.18               | 19.77±2.72              | 18.68±3.14              | 0.3595  |
| 8 weeks                                    | 19.25±2.83 <sup>a</sup>  | 20.12±2.70 <sup>ab</sup> | 21.62±1.68 <sup>b</sup> | 21.18±2.46 <sup>b</sup> | 0.0045  |
| Domain 2 (Psychological health). mean ± SD |                          |                          |                         |                         |         |
| Baseline                                   | 16.21±2.38               | 16.58±2.53               | 16.35±2.77              | 16.95±2.61              | 0.7761  |
| 2 weeks                                    | 16.29±2.33               | 16.23±2.07               | 16.92±2.21              | 16.95±2.46              | 0.5325  |
| 4 weeks                                    | 17.46±2.19 <sup>ab</sup> | 15.92±2.43 <sup>b</sup>  | 18.35±1.72 <sup>a</sup> | 18.18±2.95 <sup>a</sup> | 0.0013  |
| 8 weeks                                    | 17.46±2.19               | 16.81±2.12               | 18.35±1.72              | 18.27±3.01              | 0.0575  |
| Domain 3 (Social relationship). mean ± SD  |                          |                          |                         |                         |         |
| Baseline                                   | 7.75±2.09                | 8.46±2.02                | 8.38±1.83               | 8.27±1.49               | 0.5470  |
| 2 weeks                                    | 7.83±2.06                | 8.27±1.95                | 8.38±1.75               | 8.55±1.26               | 0.5658  |
| 4 weeks                                    | 8.17±1.97                | 8.88±1.93                | 8.58±1.81               | 8.73±1.45               | 0.5495  |

|                                           |            |            |            |            |        |
|-------------------------------------------|------------|------------|------------|------------|--------|
| 8 weeks                                   | 8.63±1.79  | 8.88±1.77  | 9.19±1.63  | 8.95±1.50  | 0.6960 |
| Domain 4(Environmental health). mean ± SD |            |            |            |            |        |
| Baseline                                  | 21.25±3.31 | 21.54±3.66 | 21.85±3.98 | 22.36±4.44 | 0.7880 |
| 2 weeks                                   | 21.13±3.55 | 22.00±3.43 | 22.81±4.00 | 23.00±4.01 | 0.2992 |
| 4 weeks                                   | 19.04±3.53 | 19.65±3.38 | 21.04±3.28 | 20.91±4.06 | 0.1484 |
| 8 weeks                                   | 23.83±3.43 | 24.04±3.50 | 25.08±3.47 | 24.86±3.60 | 0.5263 |

Values are mean ± SD. *P* indicates differences between groups at each time point. Different letters mean significant differences between groups (ANOVA followed by Tukey's test)

**Supplemental Table S3.** Complete hemogram evaluated in the subjects consuming the placebo or the WS extracts (125, 250 and 500 mg) at baseline at after the 8-weeks of intervention (safety population, n=99)

|                                 | Week | Placebo            | Ws 125 mg          | Ws 250 mg          | Ws 500 mg           |
|---------------------------------|------|--------------------|--------------------|--------------------|---------------------|
| Hemoglobin (g/dL)               | 0    | 13.43±1.64         | 13.21±1.93         | 13.69±1.74         | 14.00±1.90          |
|                                 | 8    | 13.48±1.58         | 13.13±1.50         | 13.77±1.63         | 13.90±2.05          |
| Total RBC (millions/cumm)       | 0    | 4.70±0.59          | 4.69±0.56          | 4.75±0.56          | 4.93±0.61           |
|                                 | 8    | 4.65±0.57          | 4.58±0.54          | 4.79±0.57          | 4.91±0.70           |
| Total WBC (per cumm)            | 0    | 6708.33±1845.07    | 6455.56±1831.63    | 6530.77±1565.83    | 6613.64±1357.62     |
|                                 | 8    | 7029.17±2472.01    | 6140.74±1635.02    | 6819.23±1985.55    | 6581.82±1822.51     |
| Total Platelet (per cumm)       | 0    | 283250.00±42408.21 | 266037.04±43318.57 | 263884.62±44003.02 | 286090.91±29258.96  |
|                                 | 8    | 268916.67±48388.75 | 265222.22±36808.58 | 265230.77±46791.72 | 269000.00±34097.90* |
| Neutrophill (%)                 | 0    | 63.21±6.46         | 65.48±7.75         | 63.58±6.07         | 62.41±6.68          |
|                                 | 8    | 61.92±10.49        | 65.41±6.11         | 63.50±10.50        | 63.91±4.97          |
| Lymphocyte (%)                  | 0    | 30.13±5.30         | 28.44±7.73         | 30.12±6.00         | 31.00±6.21          |
|                                 | 8    | 31.38±9.68         | 27.63±5.69         | 28.42±6.07         | 29.05±5.67          |
| Monocyte (%)                    | 0    | 2.00±0.00          | 2.00±0.00          | 1.96±0.20          | 2.00±0.00           |
|                                 | 8    | 2.00±0.00          | 1.96±0.19          | 2.00±0.00          | 2.00±0.00           |
| Eosinophill (%)                 | 0    | 4.67±2.08          | 4.07±1.96          | 4.35±2.23          | 4.59±2.79           |
|                                 | 8    | 4.46±3.04          | 4.85±2.55          | 6.19±6.78          | 5.05±3.66           |
| PCV (%)                         | 0    | 40.58±4.94         | 39.86±5.53         | 41.37±5.22         | 42.32±5.68          |
|                                 | 8    | 40.88±4.76         | 39.89±4.21         | 41.79±4.96         | 42.32±6.25          |
| MCV (fL)                        | 0    | 86.46±1.13         | 84.98±4.48         | 86.97±2.25         | 85.79±2.06          |
|                                 | 8    | 88.47±5.32         | 87.47±5.48         | 87.17±3.39         | 86.48±2.77          |
| MCH (pg)                        | 0    | 28.61±0.36         | 28.13±1.68         | 28.77±0.84         | 28.37±0.69          |
|                                 | 8    | 29.17±1.83         | 28.77±2.28         | 28.68±1.28         | 28.42±1.05          |
| MCHC (g/dL)                     | 0    | 33.09±0.10         | 33.10±0.37         | 33.09±0.27         | 33.07±0.11          |
|                                 | 8    | 32.99±0.32         | 32.83±1.01         | 32.90±0.51         | 32.86±0.55          |
| ESR_1 <sup>st</sup> hour (mm/h) | 0    | 18.21±10.09        | 16.19±10.54        | 14.88±10.09        | 10.64±8.95          |
|                                 | 8    | 16.54±9.35         | 15.56±9.84         | 14.08±10.40        | 14.73±12.18*        |

Values are mean ± SD. Asterisk (\*) indicates *p*<0.05 between baseline and the end of intervention (8 weeks) within groups
